# DNA Methylation Patterns in Cord Blood DNA and Body Size in Childhood

Caroline L. Relton<sup>1</sup>, Alexandra Groom<sup>1\*</sup>, Beate St. Pourcain<sup>2</sup>, Adrian E. Sayers<sup>3</sup>, Daniel C. Swan<sup>4</sup>, Nicholas D. Embleton<sup>5,6</sup>, Mark S. Pearce<sup>6</sup>, Susan M. Ring<sup>7</sup>, Kate Northstone<sup>2</sup>, Jon H. Tobias<sup>3</sup>, Joseph Trakalo<sup>8</sup>, Andy R. Ness<sup>9</sup>, Seif O. Shaheen<sup>10</sup>, George Davey Smith<sup>2</sup>

**1** HNRC, Institute of Genetic Medicine, Newcastle University, Newcastle upon Tyne, United Kingdom, **2** MRC Centre for Causal Analyses in Translational Epidemiology, University of Bristol, Bristol, United Kingdom, **3** Musculoskeletal Research Unit, School of Clinical Sciences, University of Bristol, Bristol, United Kingdom, **4** Bioinformatic Support Unit, Newcastle University, Newcastle upon Tyne, United Kingdom, **5** Newcastle Neonatal Service, Royal Victoria Infirmary, Newcastle upon Tyne, United Kingdom, **6** Institute of Health and Society, Newcastle University, Newcastle upon Tyne, United Kingdom, **7** School of Social and Community Medicine, University of Bristol, Bristol, United Kingdom, **8** Wellcome Trust Centre for Human Genetics, University of Oxford, Oxford, United Kingdom, **9** School of Dental Sciences, University of Bristol, Bristol, United Kingdom, **10** Barts and the London School of Medicine and Dentistry, Queen Mary University of London, London, United Kingdom

## Abstract

**Background:** Epigenetic markings acquired in early life may have phenotypic consequences later in development through their role in transcriptional regulation with relevance to the developmental origins of diseases including obesity. The goal of this study was to investigate whether DNA methylation levels at birth are associated with body size later in childhood.

**Principal Findings:** A study design involving two birth cohorts was used to conduct transcription profiling followed by DNA methylation analysis in peripheral blood. Gene expression analysis was undertaken in 24 individuals whose biological samples and clinical data were collected at a mean  $\pm$  standard deviation (SD) age of 12.35 (0.95) years, the upper and lower tertiles of body mass index (BMI) were compared with a mean (SD) BMI difference of 9.86 (2.37) kg/m<sup>2</sup>. This generated a panel of differentially expressed genes for DNA methylation analysis which was then undertaken in cord blood DNA in 178 individuals with body composition data prospectively collected at a mean (SD) age of 9.83 (0.23) years. Twenty-nine differentially expressed genes ( $>1.2$ -fold and  $p < 10^{-4}$ ) were analysed to determine DNA methylation levels at 1–3 sites per gene. Five genes were unmethylated and DNA methylation in the remaining 24 genes was analysed using linear regression with bootstrapping. Methylation in 9 of the 24 (37.5%) genes studied was associated with at least one index of body composition (BMI, fat mass, lean mass, height) at age 9 years, although only one of these associations remained after correction for multiple testing (*ALPL* with height,  $p_{\text{Corrected}} = 0.017$ ).

**Conclusions:** DNA methylation patterns in cord blood show some association with altered gene expression, body size and composition in childhood. The observed relationship is correlative and despite suggestion of a mechanistic epigenetic link between *in utero* life and later phenotype, further investigation is required to establish causality.

**Citation:** Relton CL, Groom A, St. Pourcain B, Sayers AE, Swan DC, et al. (2012) DNA Methylation Patterns in Cord Blood DNA and Body Size in Childhood. PLoS ONE 7(3): e31821. doi:10.1371/journal.pone.0031821

**Editor:** Monica Uddin, Wayne State University, United States of America

**Received:** June 30, 2011; **Accepted:** January 16, 2012; **Published:** March 14, 2012

**Copyright:** © 2012 Relton et al. This is an open-access article distributed under the terms of the Creative Commons Attribution License, which permits unrestricted use, distribution, and reproduction in any medium, provided the original author and source are credited.

**Funding:** The study was supported by the Biotechnology and Biological Sciences Research Council, <http://www.bbsrc.ac.uk/>, (BB/F007981/1). The Preterm Birth Growth Study was originally funded by Nutricia UK; support for the follow up studies was provided by Novo Nordisk and Special Trustees of Newcastle Hospitals. The UK Medical Research Council, <http://www.mrc.ac.uk/>, (Grant ref: 74882) the Wellcome Trust, <http://www.wellcome.ac.uk/>, (Grant ref: 076467) and the University of Bristol provide core support for the Avon Longitudinal Study of Parents and Children. This DNA methylation analysis aspect of this study was specifically funded by Asthma UK. The funders had no role in study design, data collection and analysis, decision to publish, or preparation of the manuscript.

**Competing Interests:** Novo Nordisk contributed funds towards the assessment in childhood, but were not involved in the project during the original interventions which were funded by Nutricia UK. Novo Nordisk played no role in the protocol development or analysis of the data. The authors have no relevant conflicts of interest relating to employment, consultancy, patents, products in development or marketed products etc. This does not alter the authors' adherence to all the PLoS ONE policies on sharing data and materials.

\* E-mail: [alix.groom@ncl.ac.uk](mailto:alix.groom@ncl.ac.uk)

## Introduction

Environmental conditions during development *in utero* and early postnatal life influence health across the lifecourse, including diseases such as obesity, type 2 diabetes and cardiovascular disease [1–3]. Epigenetic mechanisms, whereby DNA is modified with downstream influences on gene regulation, may explain how such exposures are recorded with later consequences for growth, development and health through the lifecourse [4–7].

Epigenetic patterns, in particular DNA methylation, have been studied in both animal models and human populations with respect to a variety of environmental and lifestyle exposures. Previous work has demonstrated associations between early life exposures and subsequent epigenetic patterns in offspring; between maternal postnatal behaviours in rats and DNA methylation [8,9], in humans between maternal nutrition during pregnancy and DNA methylation patterns [10] and between exposure to famine during the peri-conceptional period and DNA

methylation patterns 60 years later [11,12]. However, despite the comprehensive literature linking variation in DNA methylation to phenotypic variation in cancer or in the context of rare imprinting disorders [13] there is comparatively little evidence to date that variation in DNA methylation, or other epigenetic markings, are clearly associated with common complex diseases or the programming of such [14], although evidence is beginning to emerge in this regard [15–21]. Studies in rodent models have shown abnormalities of insulin secretion and action, appetite regulation, obesity, non-alcoholic fatty liver disease, hypertension and cardiovascular parameters following a variety of dietary challenges during pregnancy [3,22–24] and the involvement of epigenetic processes is commonly postulated, with emerging empirical evidence to support this [25]. These observations have not yet been widely extended to human populations.

In order to investigate the potential causal role of epigenetic mechanisms linking early life exposures with later phenotype, specifically focusing on the early life programming of obesity, we have undertaken a study measuring methylation patterns in cord blood DNA and interrogated their relationship with later body size and composition. A targeted approach has been adopted whereby genes have been selected for DNA methylation analysis based upon their identification through gene expression analysis of children with high or low BMI at age 11–13 years. We hypothesise that DNA methylation patterns established *in utero* influence gene regulation and subsequently body composition, and explore this in human subjects.

The study design is summarised in Figure 1. Gene expression analysis of peripheral blood RNA from children age 11–13 years (from the Preterm Birth Growth Study) [26], grouped by body mass index (BMI), was conducted and used to identify genes which were up- or down-regulated. All genes showing evidence of differential expression and which were represented on the Illumina Cancer Panel I DNA methylation array were then interrogated to establish the relationship between DNA methylation status in cord blood and later body composition in a second cohort of 178 children from the Avon Longitudinal Study of Parents and Children (ALSPAC) [27].

The existence of inter-individual variation in DNA methylation makes it likely that many associations between DNA methylation and phenotype will be identified and reported, several of which will arise through chance and prove to be spurious. A series of statistical analyses was therefore applied, with increasing levels of stringency, to ensure that only robust associations were identified and to reduce the likelihood of highlighting false positive findings.

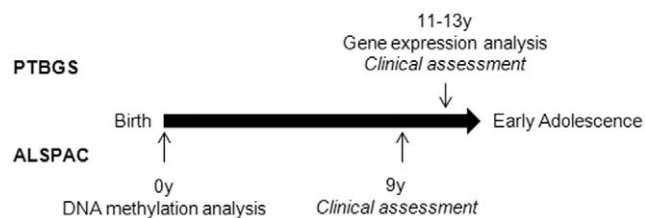

**Figure 1. Overview of study design.** Gene expression analysis was conducted on RNA samples collected at age 11–13 years when children in the Preterm Birth Growth Study (PTBGS) attended clinical assessment which included body composition measurement. Genes highlighted as being differentially expressed in relation to high/low BMI in this study group were then analysed in cord blood DNA samples from the Avon Longitudinal Study of Parents and Children (ALSPAC). Methylation levels were then analysed in relation to later body composition assessments carried out at 9 years in this study group. doi:10.1371/journal.pone.0031821.g001

## Results

### Characteristics of the study populations

Characteristics of the PTBGS and ALSPAC subjects included in this study are shown in Table S1. The two contemporaneous study populations did not show differences in body mass index at age 11 years despite discordance in gestational age and birth weight although the PTBGS children had a higher fat mass when compared to the ALSPAC children at this age. (median [IQR]; PTBGS 14,051.2g [12,064.7], ALSPAC 10,403.8g [8,970.5],  $p = 0.021$ ).

### Gene expression analysis

Fourteen samples were selected for gene expression analysis and summary details of the 2 groups (high/low BMI) are provided in Table S2. Three hundred and forty five genes were identified as being up-regulated and 190 genes down-regulated in children with high BMI. Of the 514 genes showing  $>1.2$ -fold differential expression ( $p < 10^{-4}$ ), 29 (5.6% of differentially expressed genes) were represented on the Illumina GoldenGate Cancer Panel I array with a density of coverage of 1–3 CpG sites per gene. Of these 5 genes were dropped due to their methylation status being  $>99\%$  or  $<1\%$ , leaving 44 CpG sites in 24 genes that were taken forward for analysis in the ALSPAC cohort.

### Stringent statistical analysis of DNA methylation data

OLS regression analysis (I) resulted in many associations which were not replicable using data derived methods of standard errors, including robust regression techniques (II) and bootstrapping (III). Consequently, the number of associations reduced from analysis type I to analysis type III, although results were broadly similar between II and III. Only CpG sites which showed consistency across all analyses were considered to provide robust associations, therefore we present regression estimates from the bootstrapped analysis only (Table 1). A comparison of regression estimates from all three approaches is provided in Tables S3, S4, S5, S6.

### DNA methylation at birth is associated with body size in childhood

We investigated the association between methylation at birth and BMI and its components at age 9 years, including measurements of lean mass, fat mass and height. Studying the 44 pre-selected probes corresponding to 24 candidate genes (Tables S3, S4, S5, S6), we observed a consistent association between methylation at *CDKN1C* and *EPHA1* CpG sites with BMI as well as fat mass at age 9 years (Table 1). This association was manifest as an estimated increase of 2.08% and 0.80% increase in BMI per 1% increase in methylation at *CDKN1C* and *EPHA1* respectively and an increase of 5.16% and 1.84% in fat mass per 1% increase in methylation respectively. Methylation at *CDKN1C* was also associated with lean mass, with an estimated 0.86% increase in lean mass per 1% increase in methylation. However, there was no evidence for association at either of these loci with height. Additional associations were observed between methylation at *CASP10* and BMI, methylation at *HLA-DOB* and *NID2* and fat mass and methylation at *MMP9* and *MPL* and lean mass. These and all other BMI, lean and fat mass specific findings however do not withstand multiple testing, and a larger sample is needed to confirm the robustness of the results. Adjustment of lean mass for fat mass was not reported given the high degree of collinearity of these variables due to the derivation of lean mass from fat mass measured by DXA.

We found evidence for association of methylation at *ALPL* and *IRF5* with height (Table 1). For the *ALPL* locus, an increase in 1%

**Table 1.** Bootstrap analysis of cord blood DNA methylation as a predictor of body composition (BMI, fat mass, lean mass and height) at age 9 years.

| Gene                                                         | CpG site  | BMI                        |       |      |              | Fat mass                           |       |      |              | Lean mass                          |       |      |              | Height                     |       |      |              |
|--------------------------------------------------------------|-----------|----------------------------|-------|------|--------------|------------------------------------|-------|------|--------------|------------------------------------|-------|------|--------------|----------------------------|-------|------|--------------|
|                                                              |           | <i>adj age, sex, batch</i> |       |      |              | <i>adj age, sex, height, batch</i> |       |      |              | <i>adj age, sex, height, batch</i> |       |      |              | <i>adj age, sex, batch</i> |       |      |              |
|                                                              |           | n                          | Est   | SE   | p            | n                                  | Est   | SE   | p            | n                                  | Est   | SE   | p            | n                          | Est   | SE   | p            |
| <b>Alkaline phosphatase</b>                                  | ALPL_P    | 158                        | -0.14 | 0.22 | 0.52         | 150                                | -0.11 | 0.69 | 0.878        | 150                                | 0.06  | 0.1  | 0.552        | 150                        | -0.15 | 0.04 | <b>2E-04</b> |
| <b>Caspase 10</b>                                            | CASP10_P2 | 75                         | -2.13 | 0.91 | <b>0.02</b>  | 81                                 | 0.8   | 0.8  | 0.319        | 69                                 | -0.38 | 0.34 | 0.261        | 69                         | -0.08 | 0.05 | 0.129        |
| <b>Cyclin-dependent kinase inhibitor 1C</b>                  | CDKN1C_P2 | 157                        | 2.08  | 0.97 | <b>0.031</b> | 149                                | 5.16  | 2.48 | <b>0.037</b> | 149                                | 0.86  | 0.39 | <b>0.03</b>  | 149                        | -0.02 | 0.2  | 0.928        |
| <b>Ephrin type-A receptor 1</b>                              | EPHA1_P   | 157                        | 0.8   | 0.4  | <b>0.048</b> | 149                                | 1.84  | 0.88 | <b>0.036</b> | 149                                | 0.27  | 0.15 | 0.067        | 149                        | 0.01  | 0.06 | 0.888        |
| <b>HLA class II histocompatibility antigen DO beta chain</b> | HLA_DOB3  | 158                        | -0.31 | 0.24 | 0.187        | 150                                | -0.9  | 0.44 | <b>0.039</b> | 150                                | -0.06 | 0.11 | 0.618        | 150                        | 0.02  | 0.03 | 0.624        |
| <b>Interferon regulatory factor 5</b>                        | IRF5_P    | 156                        | 0.75  | 1.05 | 0.471        | 148                                | 2.55  | 2.51 | 0.31         | 148                                | 0.6   | 0.47 | 0.204        | 148                        | -0.42 | 0.18 | <b>0.022</b> |
| <b>Interferon regulatory factor 5</b>                        | IRF5_E    | 157                        | 0.5   | 0.73 | 0.498        | 149                                | 2.89  | 1.49 | 0.053        | 149                                | 0.09  | 0.3  | 0.757        | 149                        | -0.29 | 0.13 | <b>0.026</b> |
| <b>Matrix metalloproteinase 9</b>                            | MMP9_P    | 157                        | 0.08  | 0.18 | 0.655        | 148                                | -0.12 | 0.57 | 0.836        | 148                                | 0.17  | 0.08 | <b>0.042</b> | 148                        | -0.01 | 0.06 | 0.828        |
| <b>Myeloproliferative leukemia virus oncogene</b>            | MPL_P     | 158                        | 0.1   | 0.11 | 0.353        | 150                                | 0.15  | 0.33 | 0.642        | 150                                | 0.11  | 0.05 | <b>0.021</b> | 150                        | -0.01 | 0.03 | 0.797        |
| <b>Nidogen-2</b>                                             | NID1_P    | 158                        | -0.48 | 0.3  | 0.101        | 150                                | -1.19 | 0.56 | <b>0.035</b> | 150                                | -0.1  | 0.14 | 0.827        | 150                        | 0     | 0.04 | 0.984        |

The estimate provides the magnitude and direction of effect (%) on phenotype for a 1% increase in DNA methylation at that CpG site.

doi:10.1371/journal.pone.0031821.t001

methylation at birth was related to a 0.15% decrease in height at age 9 years for an average person at an average age (within the study cohort analysed). It is likely that the observed effects are specifically related to height, as the effects were still present when the model was fully adjusted for age, sex, batch, fat mass and lean mass (adjusted estimate mean (SD) = -0.07% (0.03),  $p = 0.032$ ). Two CpG sites at the *IRF5* locus showed association with height; a CpG site in the promoter region and one in the first exon which were associated with a 0.42% and 0.29% decrease in height per 1% increase in methylation respectively (Table 1). Methylation at the two sites in this gene was correlated ( $\rho = 0.442$ ,  $p < 0.001$ ). Conservatively assuming up to 88 independent tests for body composition (mass and height independent analyses of 44 probes), only the identified association with methylation of *ALPL* and height withstands a correction for multiple testing ( $p_{\text{corrected}} = 0.017$ ). A plot of mean methylation versus  $-\log_{10} p$ -value is shown in Figure 2, indicating a relatively even distribution of statistically significant observations in genes across high, intermediate and low levels of methylation (Figure 2).

The associations between increased DNA methylation, gene expression and indices of body composition for each of the 9 genes (10 CpG sites) showing some evidence of association between cord blood DNA methylation and later phenotype are summarised in Table 2.

## Discussion

An association between DNA methylation status at birth and body size in childhood was observed in 9 of the 24 (37.5%) genes selected *a priori* due to evidence of their differential gene expression in children with high BMI. This observation suggests that variation in DNA methylation patterns at birth in multiple target genes may influence body size in childhood. This association holds particular relevance for the role of epigenetic factors as mediators in early life programming of disease in later life. Genes that demonstrate perturbed expression in children with high BMI show signs of aberrant regulation at birth, albeit in two separate study populations. A recent study reported an association between loci displaying a high level of inter-individual variation in DNA

methylation and BMI in adults [17], however this study was of elderly individuals so little can be inferred with respect to early life programming. More recent observations report an association between DNA methylation at a CpG site in the *RXR* gene promoter in DNA extracted from umbilical cord and later adiposity in children (aged 9 years) [18]. The findings of the current study are in accordance with this and offer additional support for a potential functional link between DNA methylation at birth and later adiposity, through interrogation of genes with perturbed gene expression profiles in children with high BMI.

The most robust observation in this study links DNA methylation at birth in the *ALPL* gene with decreased height at age 9 and this association is corroborated by clear evidence for a biological role of alkaline phosphatase (*ALPL*) in bone mineralization [28]. Furthermore, common polymorphisms in this gene have been associated with reduced bone mineral density, bone strength and skeletal size [29,30]. Thus increased methylation of this gene could plausibly cause gene silencing leading to reduced

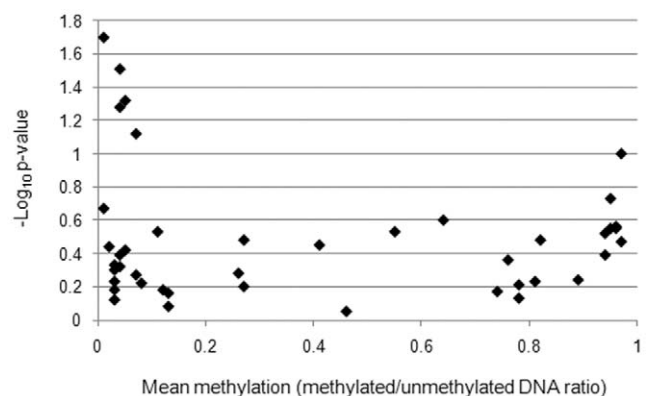

**Figure 2. Distribution of methylation-phenotype associations.** Distribution of  $-\log_{10} p$ -values for bootstrap analysis of BMI and DNA methylation in cord blood DNA according to mean methylation levels at the 44 CpG sites analysed.

doi:10.1371/journal.pone.0031821.g002

**Table 2.** A summary of the relationship between increased DNA methylation in the genes listed (at a single CpG site defined by an Illumina GoldenGate probe), gene expression and indices of body composition.

| Gene                                                  | Symbol  | Direction of expression change in high BMI children | Phenotype influenced     | Function*                                                 |
|-------------------------------------------------------|---------|-----------------------------------------------------|--------------------------|-----------------------------------------------------------|
| Alkaline phosphatase                                  | ALPL    | ↓                                                   | Height                   | Bone mineralization                                       |
| Caspase 10                                            | CASP10  | ←                                                   | BMI                      | Apoptosis                                                 |
| Cyclin-dependent kinase inhibitor 1C                  | CDKN1C  | ↓                                                   | BMI, Fat mass, Lean mass | Negative regulator of cell proliferation                  |
| Ephrin type-A receptor 1                              | EPHA1   | ↓                                                   | BMI, Fat mass            | Development (nervous system)                              |
| HLA class II histocompatibility antigen DO beta chain | HLADOB3 | ↓                                                   | Fat mass                 | Antigen presentation                                      |
| Interferon regulatory factor 5                        | IRF5    | ←                                                   | Height                   | Cell growth, differentiation, apoptosis                   |
| Matrix metalloproteinase 9                            | MMP9    | ↓                                                   | Lean mass                | Breakdown of extracellular matrix in tissue remodelling   |
| Myeloproliferative leukemia virus oncogene            | MPL     | ↓                                                   | Lean mass                | Proliferation (bone marrow haemopoietic cells)            |
| Nidogen-2                                             | NID1    | –                                                   | Fat mass                 | Cell interactions with extracellular matrix, adipogenesis |

Brief details of the known gene function and evidence of literature pertinent to body composition and/or DNA methylation for each gene are summarised.

\*As defined by GeneCards (<http://www.genecards.org/>).

doi:10.1371/journal.pone.0031821.t002

gene function manifest as reduced frame size. To our knowledge this is the first evidence linking epigenetic variation to the determination of height. Recent and extensive investigations into the genetic determinants of height show clearly that this trait is the product of many loci acting in concert [31]. Further work exploring potential epigenetic perturbation of genes known to influence height through their polymorphic variation, which now number in the hundreds, may explain a further proportion of inter-individual variation in this trait.

Previous gene expression analysis studies of adipose tissue demonstrate marked differences in gene expression in obese subjects when compared to individuals with normal BMI [32,33]. These observations in isolation do not allow one to dissect whether transcriptional changes are a cause or a consequence of the obese state. The data presented in this study extend these observations by demonstrating that DNA methylation differences are evident at birth in children who later develop high BMI and greater fat and lean mass in genes that are also differentially expressed in pre-adolescent children with high BMI. This supports the hypothesis that, at least in some biological pathways DNA methylation and gene expression changes *might* precede altered body composition and therefore obesity. Alternatively, the observed DNA methylation changes may be non-causal biomarkers un-related to gene expression and further studies are required to delineate this.

No association was observed between methylation status at the loci studied and birth weight (data not shown). This observation is in concordance with the observations of Tobi *et al.* who report no association of *in utero* growth restriction and methylation at birth at 4 loci perturbed by prenatal famine [34]. A recent study of 12 fetal cord blood samples however reports the converse, showing a correlation between both gene-specific and global DNA methylation (LINE-1) and infant birth weight [35]. Birth weight only correlates weakly with BMI at age 9 years ( $r = 0.127$ ) in the whole ALSPAC cohort of >10,000 children and the sub-group used in this study is representative of this. Our observations suggest that the DNA methylation levels of genes interrogated does not impact significantly on growth *in utero* but that any effect on phenotype would appear to be acting during postnatal and childhood development.

A major component of adipogenesis is proliferation and differentiation of adipocytes. In the current study genes associated with cell cycle and proliferation (*CDKN1C*) showed evidence of differential methylation and expression. Previous studies have shown expression of *CDKN1C* to be up-regulated in omental adipose tissue of obese adults [36]. *CDKN1C* is a negative regulator of cell growth and proliferation and mutations are also implicated in the pathogenesis of Beckwith Wiedemann Syndrome, characterised by pre- and post-natal overgrowth [37]. Down-regulation of *CDKN1C*, as well as various other imprinted genes, has also been associated with a co-ordinated decline in postnatal growth rate [38]. The *NID2* gene, methylation of which was observed to be inversely associated with fat mass in this study, also plays a role in adipogenesis [39]. Ephrin type-A receptor 1 (*EPHA1*) has been implicated in the development of the nervous system but is also involved in the control of insulin signalling, which in turn plays a large role in body composition [40].

The matrix metalloproteinase family, which includes *MMP9*, are known to degrade the extracellular matrix [39] and increased levels of plasma *MMP9* have been reported in both obese adults [41] and obese children [42]. Furthermore, Feinberg *et al.* [17] also identified *MMP9* as a locus displaying a consistent association between DNA methylation levels and BMI at two time points in older adults. In the current study no association was observed between *MMP9* methylation and BMI or fat mass but a negative correlation with height in childhood was observed.

With respect to the other genes showing evidence of an association between DNA methylation level, body size and composition, the biological evidence is less clear. To our knowledge, there are no known functional connections between *CASP10*, *HLA-DOB* or *MPL* and the determination of body size or composition.

Tissue specificity and the informativeness of non-target tissues such as peripheral blood leukocyte (PBL) DNA of methylation patterns is an area of much debate, although the use of PBL DNA [17,43–48] or cord blood DNA [35,49,50], is commonplace in epidemiological studies as often this is the only source of DNA available. We observe some overlap in the genes demonstrating differential expression and methylation in cord blood DNA with

previous published studies of adipose tissue. If considered at a pathway level we observe considerable overlap in the functional gene groups detected in cord blood DNA compared to adipose tissue (e.g. cell proliferation, apoptosis, adipogenesis). The present study underscores the utility of PBL DNA in defining biomarkers of methylation status that can be applied to epidemiological investigations to further harness information on the determinants and consequences of epigenetic variation and its impact on common complex diseases.

One further caveat of using DNA extracted from PBL or cord blood DNA is the relative contributions made by respective cell types, the ratio of which may vary for example in response to inflammation. Epigenetic signatures differ between cell types [51], although the overall impact of this is not considered to be substantial [45,48]. The 'synthesised' longitudinal design adopted in the current study largely overcomes this caveat, at least in relation to establishing the relationship between methylation and phenotype. If for example inflammation, a common co-morbidity of obesity, were to impact upon blood cell type ratio and thereby distort methylation measurements this would be problematic in a cross-sectional study design. A recent study linking methylation changes in PBL DNA to obesity in adolescents in a cross sectional study reports exactly this; that one cannot infer causation from the observed association between methylation and the obesity phenotype [52]. Methylation analysis conducted at birth many years before the development of the phenotype overcomes this problem of an inability to exclude reverse causation. A further potential limitation is that the cord blood DNA samples used in this study were not selected at random but on the presence/absence of a particular prenatal exposure and postnatal phenotype. These variables were however not correlated with BMI and the distribution of the variables included in the current study was representative of the ALSPAC cohort.

Data analysis was initially based upon OLS linear regression, which has limitations when applied to DNA methylation data. The skewed distribution of methylation data results in heteroskedastic residuals which violate the assumptions required for hypothesis testing, the high degree of co-linearity between the exposures of interest and large leverage exerted by outliers due to the small sample size require that data interpretation is approached with caution. To this end we undertook stringent statistical tests including robust regression and bootstrapping. The number of associations falling below the standard statistical threshold of  $p < 0.05$  diminished as the level of stringency increased (Tables S3, S4, S5, S6). As both robust and bootstrapping methods provided overall consistent results, our findings suggest that robust techniques might be a valuable tool for high-throughput screening which can then be followed up by more computationally intensive and time-consuming bootstrapping.

A key question remaining is what factors determine the observed inter-individual variation in DNA methylation observed in cord blood DNA? A recent study of methylation patterns in DNA from twins from multiple tissue sources, including cord blood DNA, highlighted a large degree of variation in methylation even between MZ twins [50]. This suggests that the maternal *in utero* environment, including placentation and nutrient supply, may have an important influence on the neonatal epigenome. In a study of DNA methylation in maternal infant pairs Kile *et al* [49] found variable levels of correlation between methylation patterns of mothers and their offspring, indicative of some level of environmental contribution to this discordance. Many prenatal exposures have been linked to variation in DNA methylation including smoking, depression [53] and under- or over-nutrition [10,11,54,55]. Folate exposure *in utero* has been implicated in the

determination of spinal bone mineral density at age 9 years in the ALSPAC cohort [56,57] which could in turn plausibly impact upon attained height. However, an assessment of the relationship between maternal folate intake during pregnancy, *MTHFR* genotype and body fat at age 9 years in this cohort showing no association between these factors indicates that folate exposure *in utero* is unlikely to explain the associations observed between cord blood methylation and fat mass in the current study [58].

A further and extremely relevant potential contributor to inter-individual variation in methylation at birth is the genetic determination of DNA methylation patterns. Variation in gene expression arising from allele-specific DNA methylation is well documented [59–61]. *Cis* (locally) acting genetic variation might determine DNA methylation levels and explain some of the inter-individual variation in methylation levels at birth. These changes would be expected to be stable over time and could not strictly be considered as 'programmed' events, rather inherited phenomena. The search for determinants of methylation variation at birth should include both genetic and environmental factors at play during the *in utero* period.

The current study has a number of limitations; the Illumina Cancer Panel I array was used to derive quantitative measures of gene-specific DNA methylation. This array only contained a fraction (29/514, 5.6%) of those genes observed to be differentially expressed in our high *vs* low BMI analysis. Furthermore, it is biased heavily towards tumour suppressor genes, oncogenes, DNA repair genes, cell cycle control, apoptosis and differentiation genes, X-linked and imprinted genes. This bias was overcome to a degree by the targeted approach and only using data from those genes implicated in the determination of body composition. Due to the technology employed, the reported associations rely on a few 'representative' CpG sites for each gene interrogated. A more comprehensive analysis of the gene regions of interest is required to gain a detailed understanding of the relationship between DNA methylation, gene regulation and phenotype.

As with all studies of this nature, multiple testing limits the robustness of the inferences that can be made about the observed associations. By applying robust statistical approaches we consider that we have minimised the potential for false positives, however further studies are required to establish the true validity of our observations. In addition to replication of the reported observations in other cohorts, further investigation of temporal variation in DNA methylation patterns from birth across childhood would be highly informative, together with examination of their relationship with developmental trajectories of body composition traits. The use of novel approaches for strengthening causal inference could also be usefully adopted [62–64]. Future studies should also include the analysis of DNA methylation using other methodological approaches to quantify DNA methylation, in particular the fine mapping of DNA methylation and DNA sequence variation across the genes identified in this study.

## Materials and Methods

### Study populations

Ethical approval was obtained from the ALSPAC Law and Ethics Committee and Local Research Ethics Committees in accordance with the guidelines of The Declaration of Helsinki. Written informed consent was obtained for all participants in the study.

**Preterm Birth Growth Study (PTBGS).** Healthy preterm infants ( $\leq 34$  weeks gestation) were recruited from the Special Care Baby Unit, Royal Victoria Infirmary, Newcastle upon Tyne, UK [26], and were followed up intensively through childhood. Clinical

assessment including anthropometric and biochemical markers was undertaken at 11–13 years of age when blood samples were taken for DNA and RNA analysis. Of the original study cohort 24/83 individuals contributed to this study.

**Avon Longitudinal Study of Parents and Children (ALSPAC).** Pregnant women from the Avon area in the South West of England whose expected dates of delivery were between April 1991 and December 1992 were invited to take part in the study, which was successful in recruiting over 14,000 pregnancies in this time period. ALSPAC is a prospective study and the extensive data collected during pregnancy and throughout childhood is described in detail elsewhere (<http://www.alspac.bristol.ac.uk>) [27]. Data pertaining to body composition at 9 years of age and relevant covariates were provided for use in this study. DNA extracted from cord blood was used for DNA methylation analysis ( $n = 178$ ). Samples were selected as part of a prior study according to use (or not) of paracetamol during pregnancy and the presence/absence of asthma at age 91 months of age.

Summary details of the two study populations are provided in Table S1.

### RNA and DNA isolation

**PTBGS.** 2.5 ml of blood were drawn into a PAXgene™ Blood RNA tube (PreAnalytiX QIAGEN GmbH), incubated at room temperature for 2 hours and then stored at  $-70^{\circ}\text{C}$  until extracted. Total RNA was extracted from whole blood using the PAXgene™ Blood RNA System Kit following the manufacturer's instructions. RNA Integrity Number (RIN) was assessed using RNA Nano 6000 chips run on an Agilent 2100 Bioanalyzer (Agilent Technologies, Inc., Palo Alto, California, USA) and concentration determined using a NanoDrop™ ND-1000 spectrophotometer (NanoDrop Technologies, Thermo Fisher Scientific Inc., Waltham, MA, USA). Blood drawn into EDTA was used for DNA extraction using QIAamp DNA blood midi kit (Qiagen, Crawley, UK) following the manufacturer's protocol.

**ALSPAC.** DNA extraction applied standard phenol-chloroform extraction methods. DNA was re-suspended in 2 mM Tris and stored at  $-80^{\circ}\text{C}$ .

### Gene expression analysis

Individuals were selected from the PTBGS who participated in a follow-up clinical examination of cardiometabolic traits during 2007–2008. Of the 24 subjects analysed, subjects passing QC representing the highest ( $n = 7$ ) and lowest ( $n = 7$ ) tertiles of distribution of BMI were compared; mean difference [SD] in BMI was 9.86 [2.37]  $\text{kg}/\text{m}^2$ . Summary details of the two groups are provided in Table S2. No differences in height were evident between the two groups but they were, as expected, significantly discordant in weight, BMI and fat mass ( $p < 0.002$ ). RNA samples were sent to ServiceXS (Leiden, The Netherlands) for globin reduction, labelling, hybridization to Human NuGO-Hs1a520180 GeneChip arrays (covering 23,941 probes) and scanning of the arrays. Globin reduction was performed using GeneChip® Globin-Reduction kit (PreAnalytiX QIAGEN GmbH, Affymetrix Inc., Santa Clara, California) according to the manufacturer's instructions (Mat. No. 1029528) using Peptide Nucleic Acid (PNA) oligonucleotides complementary to human globin mRNA transcripts (PNA; GR PNA-L G2001 Panagene Inc., Korea) and Globin-Reduction RNA controls (No. 900586, PreAnalytiX QIAGEN GmbH, Affymetrix Inc., Santa Clara, California). Human NuGO-Hs1a520180 GeneChip CEL files were normalised in BioConductor (<http://genomebiology.com/2004/5/10/R80/>) using the GCRMA package. Genes with differential expression between BMI groups were identified with the

RankProd package ( $< 0.05$  with 100 permutations of the class labels) (<http://bioinformatics.oxfordjournals.org/content/22/22/2825.full>). Annotations were attached to probe sets from the nugohs1a520180.db library (<http://www.bioconductor.org/help/biocviews/2.6/data/annotation/html/nugohs1a520180.db.html>). Raw and normalised data from the experiment was deposited in GEO (<http://www.ncbi.nlm.nih.gov/geo/>) with accession number GSE22013.

### DNA methylation analysis

500 ng genomic DNA was treated with sodium bisulphite to convert unmethylated cytosine to uracil using the EZ-96 DNA Methylation Kit™ (Zymo Research, Cambridge Biosciences, UK) according to the manufacturer's recommendations. Site-specific CpG methylation was analysed using 5  $\mu\text{l}$  (at 50 ng/ $\mu\text{l}$ ) bisulphite treated DNA using the GoldenGate® Cancer Panel I Array (Illumina Inc, USA) and the GoldenGate® Assay Kit with UDG on the Sentrix Universal-96 Array matrix v7A. This panel covers 1505 CpG sites selected from 807 genes, with a minimum of 719 genes overlapping with the expression array. The analysis was performed with background normalisation across two sample plates (batches) comprised of 96 samples each. The assay failed for 4 of the 1505 CpG sites. Arrays were imaged using a BeadArray scanner and image processing and intensity data extracted using Illumina BeadStudio v3.2, methylation module v3.2.5 custom software. The level of methylation at a given CpG site was determined by comparing the proportion of methylated to unmethylated signal (expressed as a beta score, 0–1). Four samples were assayed in duplicate in plate 1.

### Indices of body composition

**PTBGS.** Children were measured wearing a light hospital gown. Weight (to the nearest 0.1 kg) and height (to the nearest 0.1 cm) were measured using standard procedures, calibrated weighing scales (Tanita, Arlington Heights, Illinois) and a Harpenden stadiometer (Holtain Crosswell, Dyfed), and BMI ( $\text{kg}/\text{m}^2$ ) calculated. Fat and lean mass were assessed using total body scan mode on a GE Lunar iDXA machine and software version v11.

**ALSPAC.** Height was measured to the nearest 0.1 cm using a Harpenden stadiometer (Holtain Crosswell, Dyfed) and weight while wearing underwear was measured to the nearest 50 g using Tanita body fat analyser (model TBF 305, Tanita, Arlington Heights, Illinois). Fat mass and lean mass were assessed by whole body dual energy X-ray absorptiometry (DXA) (Prodigy scanner, Lunar Radiation Corp, Madison, Wisconsin, US).

### Data analysis

DNA methylation status in 178 cord blood DNA samples from the ALSPAC cohort was analysed for a total of 54 CpG sites in 29 genes. Where fewer than  $n = 178$  were included in the analyses, this was due to missing phenotype data or poor call rates for particular probes. Distribution of DNA methylation at each CpG site was defined and those sites that were either fully methylated ( $\text{mean} > 0.99$ ) or fully un-methylated ( $\text{mean} < 0.01$ ) or with  $> 25\%$  samples with methylation values = 0 were dropped from the data set (10 CpG sites dropped, leaving 24 genes and 44 CpG sites included in remaining analysis). Percentage DNA methylation levels at the remaining 44 CpG sites were analysed to assess the relationship between methylation level and BMI, fat mass (g), lean mass (g) and height (cm) at age 9 years. BMI, fat and lean mass were log-transformed (natural logarithm) as they were not normally distributed (in agreement with numerous other studies where these variables commonly show a positively skewed

distribution [65]). We selected several complementary analysis methods with increasing levels of robustness towards violations of normality, outlier effects and heteroskedasticity given the moderate sample numbers available for analysis ( $n \sim 150$ ) in the present study. Specifically, we performed (I) ordinary least squared (OLS) regression and (II) robust regression [66], followed by (III) a non-parametric bootstrapping of the OLS model (I). Adjustments were made for age at clinic attendance (in months) and sex in all models due to their potential confounding influence on DNA methylation and outcome measures (i.e. BMI, height, lean and fat mass). Sample batch (plate) was also included as a covariate in all models due to its potential to cause substantial variation and bias in the DNA methylation data. Finally, height was included as a covariate in models assessing lean mass and fat mass due to its strong influence on these outcome measures. Further adjustment for height, lean mass and fat mass were made depending on the outcome variable being considered. Data were analysed using the statistical software package STATA (version 10.0) (Stata Corp, College Station, TX) and the R software (version 2.12.1).

## Supporting Information

**Table S1 Descriptive statistics for the two study cohorts.** The Preterm Birth Growth Study; DNA samples and outcome measures collected at age 11–13 y were used for gene expression analysis and the Avon Longitudinal Study of Parents and Children DNA samples extracted from cord blood were used for DNA methylation analysis with outcome measures collected at age 9 years. Data collected in ALSPAC at age 11 years are provided for comparative purposes. Medians (inter-quartile range) are presented. P-values for Mann Whitney U test comparing variables in the Preterm Birth Growth Study and the ALSPAC cohort at age 11 y are provided. (DOC)

**Table S2 Comparison of low and high BMI groups selected from the Preterm Birth Growth Study for gene expression analysis.** Mean (standard deviation) values are

presented with t-test for between group comparisons, unless otherwise stated. \*Median (inter-quartile range) presented and Mann-Whitney U statistic for between group comparisons. (DOC)

**Table S3 Increase in % BMI for 1% increase in methylation.** Adjusted for age, sex and inter-plate variation. (DOC)

**Table S4 Increase in % fat mass for 1% increase in methylation.** Adjusted for age, sex, height and inter-plate variation. (DOC)

**Table S5 Increase in % lean mass for 1% increase in methylation.** Adjusted for age, sex, height and inter-plate variation. (DOC)

**Table S6 Increase in % height for 1% increase in methylation.** Adjusted for age, sex and inter-plate variation. (DOC)

## Acknowledgments

The authors wish to thank all of the study members for their previous and continued involvement in the Newcastle Preterm Birth Growth Studies. We are extremely grateful to all the families who took part in the ALSPAC study, the midwives for their help in recruiting them, and the whole ALSPAC team, which includes interviewers, computer and laboratory technicians, clerical workers, research scientists, volunteers, managers, receptionists and nurses. Dr SM Korada is acknowledged for his contribution to clinical follow-up of the PTBGS cohort and Dr Catherine Potter for her helpful comments during preparation of the manuscript.

## Author Contributions

Conceived and designed the experiments: CLR GDS. Analyzed the data: BStP AES CLR. Wrote the paper: CLR AG RStP AS DCS NDE MSP SMR KN JHT JT ARN SOS GDS. Undertook the follow-up of the PTBGS: NDE. Statistical support: MSP. Extracted relevant data and biological samples from the ALSPAC study: GDS SMR KN. Contributed to fat and lean mass assessment of the ALSPAC study: ARN JHT. Undertook gene expression analysis: AG. Bioinformatic support of gene expression analysis: DCS. Oversaw the Illumina GoldenGate DNA methylation analysis of ALSPAC study samples: SOS.

## References

- Barker DJ (2002) Fetal programming of coronary heart disease. *Trends Endocrinol Metab* 13: 364–368.
- Langley-Evans SC, McMullen S (2010) Developmental origins of adult disease. *Med Princ Pract* 19: 87–98.
- Warner MJ, Ozanne SE (2010) Mechanisms involved in the developmental programming of adulthood disease. *Biochem J* 427: 333–347.
- Barnes SK, Ozanne SE (2010) Pathways linking the early environment to long-term health and lifespan. *Prog Biophys Mol Biol* 106: 323–336.
- Mathers JC, McKay JA (2009) Epigenetics - potential contribution to fetal programming. *Adv Exp Med Biol* 646: 119–123.
- Thornburg KL, Shannon J, Thuillier P, Turker MS (2010) In utero life and epigenetic predisposition for disease. *Adv Genet* 71: 57–78.
- Waterland RA (2009) Is epigenetics an important link between early life events and adult disease? *Horm Res* 71 Suppl 1: 13–16.
- McGowan PO, Suderman M, Sasaki A, Huang TC, Hallett M, et al. (2011) Broad epigenetic signature of maternal care in the brain of adult rats. *PLoS One* 6: e14739.
- Meaney MJ, Szyf M (2005) Environmental programming of stress responses through DNA methylation: life at the interface between a dynamic environment and a fixed genome. *Dialogues Clin Neurosci* 7: 103–123.
- Burdge GC, Lillycrop KA (2010) Nutrition, epigenetics, and developmental plasticity: implications for understanding human disease. *Annu Rev Nutr* 30: 315–339.
- Heijmans BT, Tobi EW, Stein AD, Putter H, Blauw GJ, et al. (2008) Persistent epigenetic differences associated with prenatal exposure to famine in humans. *Proc Natl Acad Sci U S A* 105: 17046–17049.
- Tobi EW, Lumey LH, Talens RP, Kremer D, Putter H, et al. (2009) DNA methylation differences after exposure to prenatal famine are common and timing- and sex-specific. *Hum Mol Genet* 18: 4046–4053.
- Nicholls RD (2000) The impact of genomic imprinting for neurobehavioral and developmental disorders. *J Clin Invest* 105: 413–418.
- Relton CL, Davey Smith G (2010) Epigenetic epidemiology of common complex disease: prospects for prediction, prevention, and treatment. *PLoS Med* 7: e1000356.
- Baccarelli A, Rienstra M, Benjamin EJ (2010) Cardiovascular epigenetics: basic concepts and results from animal and human studies. *Circ Cardiovasc Genet* 3: 567–573.
- Baccarelli A, Wright R, Bollati V, Litonjua A, Zanobetti A, et al. (2010) Ischemic heart disease and stroke in relation to blood DNA methylation. *Epidemiology* 21: 819–828.
- Feinberg AP, Irizarry RA, Fradin D, Aryee MJ, Murakami P, et al. (2010) Personalized epigenomic signatures that are stable over time and covary with body mass index. *Sci Transl Med* 2: 49ra67.
- Godfrey KM, Sheppard A, Gluckman PD, Lillycrop KA, Burdge GC, et al. (2011) Epigenetic gene promoter methylation at birth is associated with child's later adiposity. *Diabetes* 60: 1528–1534.
- Perera F, Tang WY, Herbstman J, Tang D, Levin L, et al. (2009) Relation of DNA methylation of 5'-CpG island of ACSL3 to transplacental exposure to airborne polycyclic aromatic hydrocarbons and childhood asthma. *PLoS One* 4: e4488.
- Portela A, Esteller M (2010) Epigenetic modifications and human disease. *Nat Biotechnol* 28: 1057–1068.
- Turunen MP, Aavik E, Yla-Herttuala S (2009) Epigenetics and atherosclerosis. *Biochim Biophys Acta* 1790: 886–891.
- Bouret SG, Simerly RB (2006) Developmental programming of hypothalamic feeding circuits. *Clin Genet* 70: 295–301.
- Oben JA, Mouralidarane A, Samuelsson AM, Matthews PJ, Morgan ML, et al. (2010) Maternal obesity during pregnancy and lactation programs the

- development of offspring non-alcoholic fatty liver disease in mice. *J Hepatol* 52: 913–920.
24. Samuelsson AM, Matthews PA, Argenton M, Christie MR, McConnell JM, et al. (2008) Diet-induced obesity in female mice leads to offspring hyperphagia, adiposity, hypertension, and insulin resistance: a novel murine model of developmental programming. *Hypertension* 51: 383–392.
  25. Sandovici I, Smith NH, Nitert MD, Ackers-Johnson M, Uribe-Lewis S, et al. (2011) Maternal diet and aging alter the epigenetic control of a promoter-enhancer interaction at the *Hnf4a* gene in rat pancreatic islets. *Proc Natl Acad Sci U S A* 108: 5449–5454.
  26. Cooke RJ, Griffin IJ, McCormick K, Wells JC, Smith JS, et al. (1998) Feeding preterm infants after hospital discharge: effect of dietary manipulation on nutrient intake and growth. *Pediatr Res* 43: 355–360.
  27. Golding J, Pembrey M, Jones R (2001) ALSPAC—the Avon Longitudinal Study of Parents and Children. I. Study methodology. *Paediatr Perinat Epidemiol* 15: 74–87.
  28. Waymire KG, Mahuren JD, Jaje JM, Guilarte TR, Coburn SP, et al. (1995) Mice lacking tissue non-specific alkaline phosphatase die from seizures due to defective metabolism of vitamin B-6. *Nat Genet* 11: 45–51.
  29. Cheung CL, Livshits G, Zhou Y, Meigs JB, McAtcer JB, et al. (2009) Hip Geometry Variation is Associated With Bone Mineralization Pathway Gene Variants: The Framingham Study. *J Bone Miner Res*.
  30. Goseki-Sone M, Sogabe N, Fukushi-Irie M, Mizoi L, Orimo H, et al. (2005) Functional analysis of the single nucleotide polymorphism (787T>C) in the tissue-nonspecific alkaline phosphatase gene associated with BMD. *J Bone Miner Res* 20: 773–782.
  31. Lettre G (2011) Recent progress in the study of the genetics of height. *Hum Genet* 129: 465–472.
  32. Gomez-Ambrosi J, Catalan V, Diez-Caballero A, Martinez-Cruz LA, Gil MJ, et al. (2004) Gene expression profile of omental adipose tissue in human obesity. *FASEB J* 18: 215–217.
  33. Pietiläinen KH, Naukkarinen J, Rissanen A, Saharinen J, Ellonen P, et al. (2008) Global transcript profiles of fat in monozygotic twins discordant for BMI: pathways behind acquired obesity. *PLoS Med* 5: e51.
  34. Tobi EW, Heijmans BT, Kremer D, Putter H, Deleamarre-van de Waal HA, et al. (2011) DNA methylation of IGF2, GNASAS, INSIGF and LEP and being born small for gestational age. *Epigenetics* 6: 171–176.
  35. Fryer AA, Emes RD, Ismail KM, Haworth KE, Mein C, et al. (2011) Quantitative, high-resolution epigenetic profiling of CpG loci identifies associations with cord blood plasma homocysteine and birth weight in humans. *Epigenetics* 6: 86–94.
  36. Qiu J, Ni YH, Gong HX, Fei L, Pan XQ, et al. (2007) Identification of differentially expressed genes in omental adipose tissues of obese patients by suppression subtractive hybridization. *Biochem Biophys Res Commun* 352: 469–478.
  37. Lim AL, Ferguson-Smith AC (2010) Genomic imprinting effects in a compromised in utero environment: implications for a healthy pregnancy. *Semin Cell Dev Biol* 21: 201–208.
  38. Lui JC, Finkelstein GP, Barnes KM, Baron J (2008) An imprinted gene network that controls mammalian somatic growth is down-regulated during postnatal growth deceleration in multiple organs. *Am J Physiol Regul Integr Comp Physiol* 295: R189–196.
  39. Mariman EC, Wang P (2010) Adipocyte extracellular matrix composition, dynamics and role in obesity. *Cell Mol Life Sci* 67: 1277–1292.
  40. Kulkarni RN, Kahn CR (2007) Ephs and ephrins keep pancreatic Beta cells connected. *Cell* 129: 241–243.
  41. Derosa G, Ferrari I, D'Angelo A, Tinelli C, Salvadeo SA, et al. (2008) Matrix metalloproteinase-2 and -9 levels in obese patients. *Endothelium* 15: 219–224.
  42. Glowinska-Olszewska B, Urban M (2007) Elevated matrix metalloproteinase 9 and tissue inhibitor of metalloproteinase 1 in obese children and adolescents. *Metabolism* 56: 799–805.
  43. Bjornsson HT, Sigurdsson MI, Fallin MD, Irizarry RA, Aspelund T, et al. (2008) Intra-individual change over time in DNA methylation with familial clustering. *JAMA* 299: 2877–2883.
  44. Gemma C, Sookoian S, Dieuzeide G, Garcia SI, Gianotti TF, et al. (2010) Methylation of TFAM gene promoter in peripheral white blood cells is associated with insulin resistance in adolescents. *Mol Genet Metab* 100: 83–87.
  45. Talens RP, Boomsma DI, Tobi EW, Kremer D, Jukema JW, et al. (2010) Variation, patterns, and temporal stability of DNA methylation: considerations for epigenetic epidemiology. *FASEB J* 24: 3135–3144.
  46. Terry MB, Ferris JS, Pilsner R, Flom JD, Tehranifar P, et al. (2008) Genomic DNA methylation among women in a multiethnic New York City birth cohort. *Cancer Epidemiol Biomarkers Prev* 17: 2306–2310.
  47. Toledo-Rodriguez M, Lotfipour S, Leonard G, Perron M, Richer L, et al. (2010) Maternal smoking during pregnancy is associated with epigenetic modifications of the brain-derived neurotrophic factor-6 exon in adolescent offspring. *Am J Med Genet B Neuropsychiatr Genet* 153B: 1350–1354.
  48. Zhu ZZ, Hou L, Bollati V, Tarantini L, Marinelli B, et al. (2010) Predictors of global methylation levels in blood DNA of healthy subjects: a combined analysis. *Int J Epidemiol*.
  49. Kile ML, Baccarelli A, Tarantini L, Hoffman E, Wright RO, et al. Correlation of global and gene-specific DNA methylation in maternal-infant pairs. *PLoS One* 5: e13730.
  50. Ollikainen M, Smith KR, Joo EJ, Ng HK, Andronikos R, et al. (2010) DNA methylation analysis of multiple tissues from newborn twins reveals both genetic and intrauterine components to variation in the human neonatal epigenome. *Hum Mol Genet* 19: 4176–4188.
  51. Wu HC, Delgado-Cruzata L, Flom JD, Kappil M, Ferris JS, et al. (2011) Global methylation profiles in DNA from different blood cell types. *Epigenetics* 6: 76–85.
  52. Wang X, Zhu H, Snieder H, Su S, Munn D, et al. (2010) Obesity related methylation changes in DNA of peripheral blood leukocytes. *BMC Med* 8: 87.
  53. Oberlander TF, Weinberg J, Papsdorf M, Grunau R, Misri S, et al. (2008) Prenatal exposure to maternal depression, neonatal methylation of human glucocorticoid receptor gene (NR3C1) and infant cortisol stress responses. *Epigenetics* 3: 97–106.
  54. Plagemann A, Roeckle K, Harder T, Brunn M, Harder A, et al. (2010) Epigenetic malprogramming of the insulin receptor promoter due to developmental overfeeding. *J Perinat Med* 38: 393–400.
  55. Vucetic Z, Kimmel J, Reyes TM (2011) Chronic high-fat diet drives postnatal epigenetic regulation of mu-opioid receptor in the brain. *Neuropsychopharmacology* 36: 1199–1206.
  56. Steer CD, Emmett PM, Lewis SJ, Smith GD, Tobias JH (2009) Methylene-tetrahydrofolate reductase (MTHFR) C677T polymorphism is associated with spinal BMD in 9-year-old children. *J Bone Miner Res* 24: 117–124.
  57. Tobias JH, Steer CD, Emmett PM, Tonkin RJ, Cooper C, et al. (2005) Bone mass in childhood is related to maternal diet in pregnancy. *Osteoporos Int* 16: 1731–1741.
  58. Lewis SJ, Leary S, Davey Smith G, Ness A (2009) Body composition at age 9 years, maternal folate intake during pregnancy and methyltetrahydrofolate reductase (MTHFR) C677T genotype. *Br J Nutr* 102: 493–496.
  59. Knight JC (2004) Allele-specific gene expression uncovered. *Trends Genet* 20: 113–116.
  60. Meaburn EL, Schalkwyk LC, Mill J (2010) Allele-specific methylation in the human genome: implications for genetic studies of complex disease. *Epigenetics* 5: 578–582.
  61. Tycko B (2010) Allele-specific DNA methylation: beyond imprinting. *Hum Mol Genet* 19: R210–220.
  62. Groom A, Potter C, Swan DC, Fatemifar G, Evans DM, et al. (2011) Postnatal growth and DNA methylation are associated with differential gene expression of the TACSTD2 gene and childhood fat mass. *Diabetes*. In press.
  63. Relton CL, Davey Smith G (2011) Two step epigenetic Mendelian randomization: a strategy for establishing a role for epigenetic factors in causal pathways to disease. *Int J Epidemiol* In press.
  64. Davey Smith G (2008) Assessing intrauterine influences on offspring health outcomes: can epidemiological findings yield robust results? *Basic Clin Pharmacol Toxicol* 102: 245–256.
  65. Penman AD, Johnson WD (2006) The changing shape of the body mass index distribution curve in the population: implications for public health policy to reduce the prevalence of adult obesity. *Prev Chronic Dis* 3(3): A74.
  66. Long JS, Ervin LH (2000) Using Heteroscedasticity Consistent Standard Errors in the Linear Regression Model. *The American Statistician* 54: 217–224.
